# Supplementary material
Source: HighWire-hosted journal article supplement (doi:10.1101/rna.076778.120)
Supplement: Supplemental_Figures_DNA_sequences.docx [file Supplemental_Figures_DNA_sequences.docx]

**SUPPLEMENTARY INFORMATION**

**Single-pass transcription by T7 RNA polymerase**

Luiz F. M. Passalacqua1,4, Armine I. Dingilian1, Andrej Lupták1,2,3

1 Department of Pharmaceutical Sciences, University of California, Irvine, California 92697, United States

2 Department of Chemistry, University of California, Irvine, California 92697, United States

3 Department of Molecular Biology and Biochemistry, University of California, Irvine, California 92697, United States

4 Present address: Laboratory of RNA Biophysics and Cellular Physiology, National Heart, Lung, and Blood Institute – National Institutes of Health, Bethesda, Maryland 20892, United States

Correspondence: aluptak@uci.edu

**
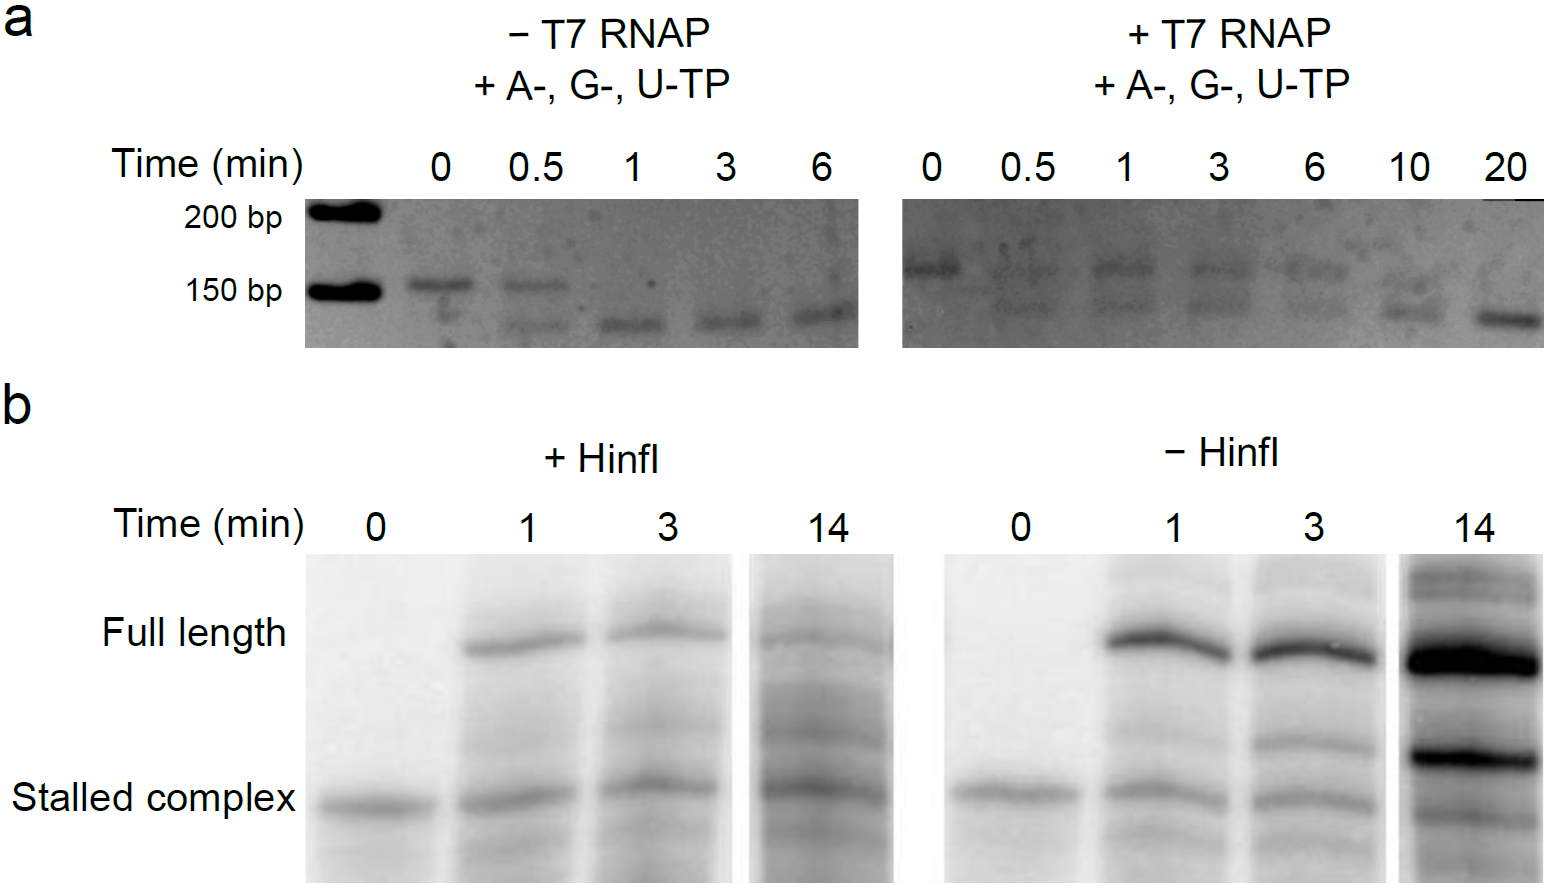
**

**Figure S1. Cleavage and transcription of the aHDV DNA template*.*****(a)** Kinetics of the promoter cleavage by HinfI in a reaction mixture containing GTP, ATP, and UTP in the absence of T7 RNAP (left) and in the presence of the stalled T7 RNAP complex at position +11 (right). **(b)** Denaturing PAGE analysis of the HinfI treated (left) and non-treated (right) transcription reaction before the addition of CTP (stalled complex, indicated as timepoint 0) and after the addition of CTP over time.

**
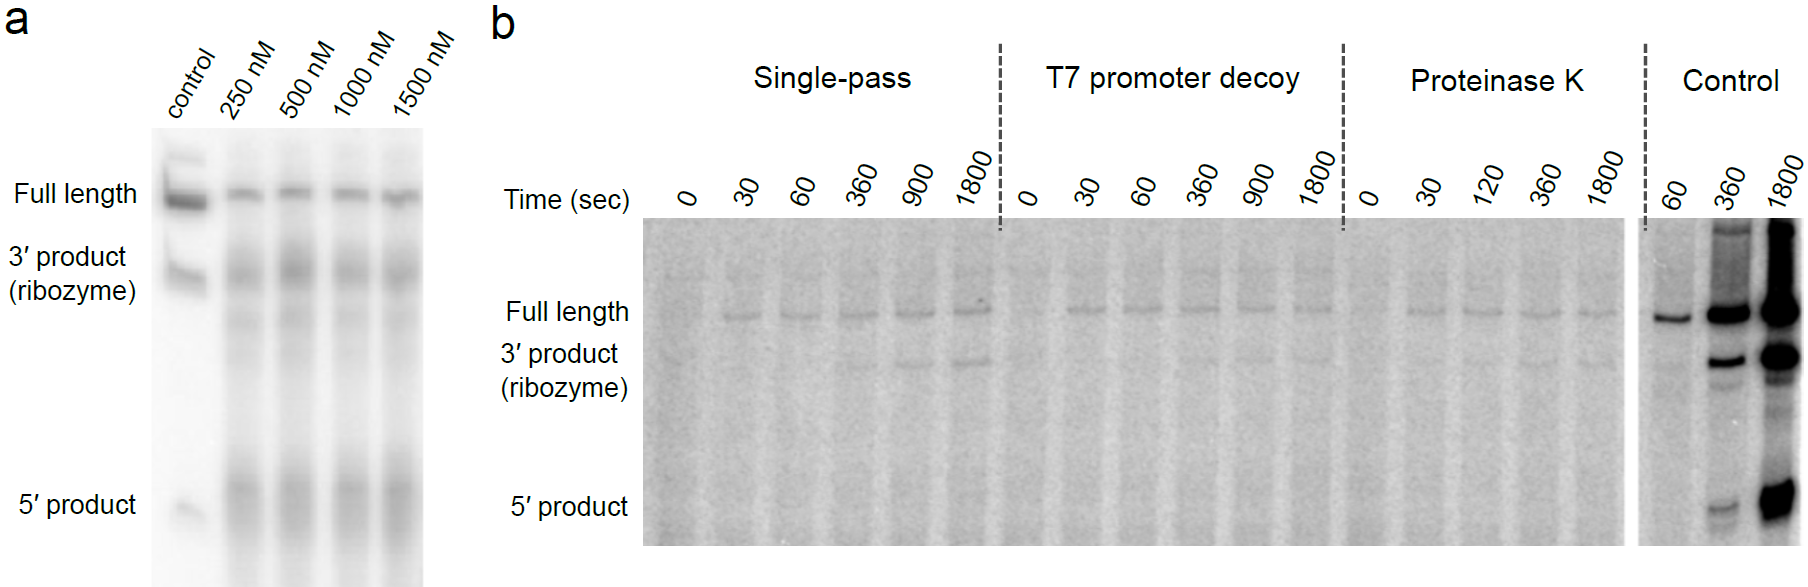
**

**Figure S2. Optimization of single-pass transcription.** **(a)** Denaturing PAGE analysis of the drz–Fpra–2 ribozyme transcription reaction in the absence (control) or presence of increasing concentration of the HinfI restriction enzyme. **(b)** Denaturing PAGE analysis of the optimization of the drz–Fpra–2 ribozyme single-pass transcription reaction compared to the addition of T7 promoter decoy DNA template to outcompete reinitiation of transcription from any non-digested DNA template, and to the addition of proteinase K 45 seconds after the addition of CTP to digest T7 RNAP and cease any new transcription. Control reaction was not treated with HinfI.

**
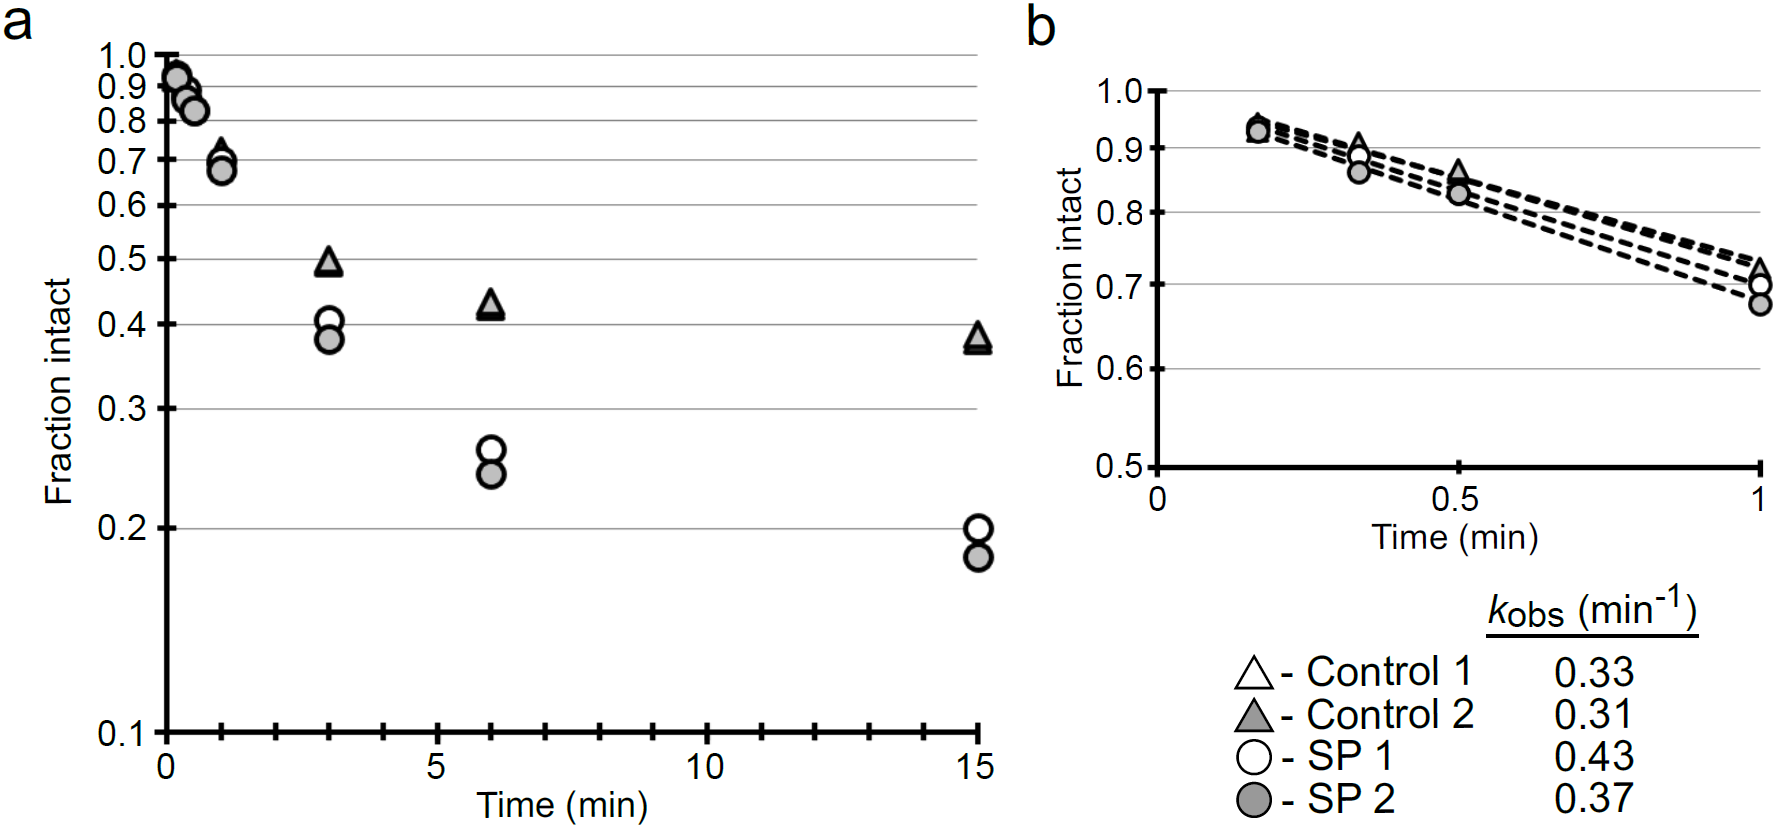
**

**Figure S3. Co-transcriptional self-scission of the** **drz–Fpra–2 ribozyme.** **(a)** Log-linear graph of ribozyme self-scission of control (triangles) and single-pass (circles) experiments. **(b)** *In vitro* co-transcriptional self-cleavage kinetics of the early time points are modeled by a monoexponential decay function (Eq. 1) and the self-cleavage rate constants derived for each experiment are presented below the graph.

**
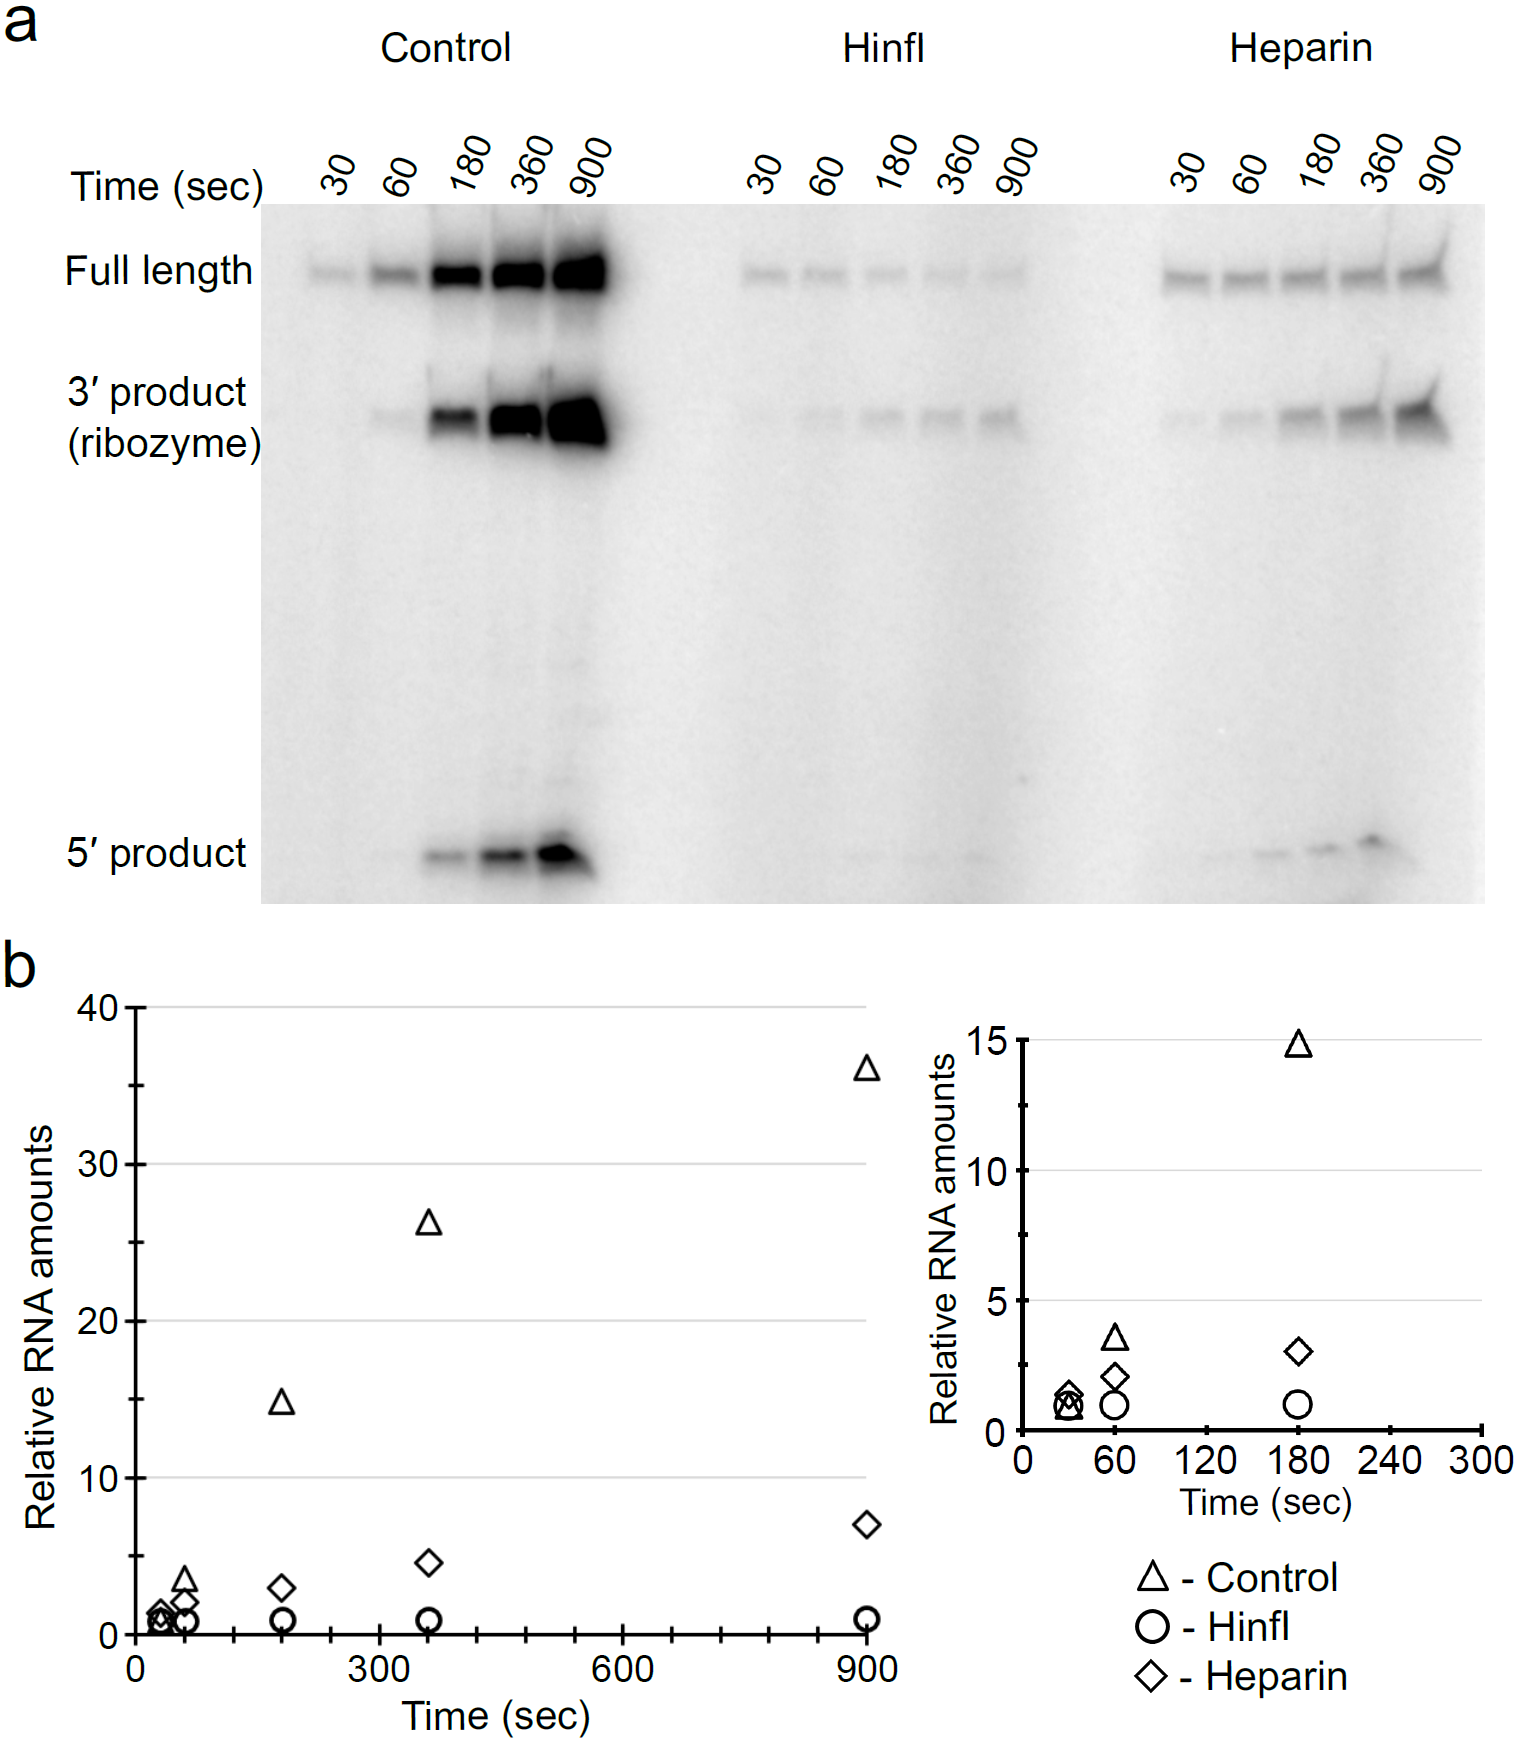
 Figure S4. Comparison of RNA synthesis kinetics in the presence of HinfI and heparin.** **(a)** Denaturing PAGE analysis of the drz–Fpra–2 ribozyme transcription reaction in the absence (control) or presence of HinfI (SP; single-pass transcription), or in the presence of heparin. **(b)** Comparison of relative RNA production over time for the control (triangle), HinfI (circle) and heparin (diamond) experiments, normalized to the single-pass reaction value at the 900-sec timepoint. Early timepoints are shown in inset.

**DNA sequences used in this project.** The full length drz–Fpra–2 DNA sequence with T7 promoter (underlined), and leader sequence is: 5'–TAATACGACTCACTATAGGGAGATATAAGGTTGTGGGAAGGTT**C**TCACAGCTTTGCCGCTCGAAACTTTGCACACCTCTACGCGGTGGGTGGCAGGCAACACATGAGAATGTGGCTGAGATGCAATATTGTC–3'. The first cytosine is in bold. To amplify the template by PCR, the forward primer sequences used in this study were 5'–TAATACGACTCACTATAGG–3' and 5'–GACAATATTGCATCTCAGCCACAT–3'. The full-length Klentaq DNA polymerase DNA sequence with T7 promoter (underlined), and leader sequence is:

5'–TAATACGACTCACTATAGGGAGATATAAGGTTGTGGGAAGGTT**C**CACAACGGTTTCCCTCTAGAAATAATTTTGTTTAACTTTAAGAAGGAGATATATCCATGGGCCTCCTCCACGAGTTCGGCCTTCTGGAAAGCCCCAAGGCCCTGGAGGAGGCCCCCTGGCCCCCGCCGGAAGGGGCCTTCGTGGGCTTTGTGCTTTCCCGCAAGGAGCCCATGTGGGCCGATCTTCTGGCCCTGGCCGCCGCCAGGGGGGGCCGGGTCCACCGGGCCCCCGAGCCTTATAAAGCCCTCAGGGACCTGAAGGAGGCGCGGGGGCTTCTCGCCAAAGACCTGAGCGTTCTGGCCCTGAGGGAAGGCCTTGGCCTCCCGCCCGGCGACGACCCCATGCTCCTCGCCTACCTCCTGGACCCTTCCAACACCACCCCCGAGGGGGTGGCCCGGCGCTACGGCGGGGAGTGGACGGAGGAGGCGGGGGAGCGGGCCGCCCTTTCCGAGAGGCTCTTCGCCAACCTGTGGGGGAGGCTTGAGGGGGAGGAGAGGCTCCTTTGGCTTTACCGGGAGGTGGAGAGGCCCCTTTCCGCTGTCCTGGCCCACATGGAGGCCACGGGGGTGCGCCTGGACGTGGCCTATCTCAGGGCCTTGTCCCTGGAGGTGGCCGAGGAGATCGCCCGCCTCGAGGCCGAGGTCTTCCGCCTGGCCGGCCACCCCTTCAACCTCAACTCCCGGGACCAGCTGGAAAGGGTCCTCTTTGACGAGCTAGGGCTTCCCGCCATCGGCAAGACGGAGAAGACCGGCAAGCGCTCCACCAGCGCCGCCGTCCTGGAGGCCCTCCGCGAGGCCCACCCCATCGTGGAGAAGATCCTGCAGTACCGGGAGCTCACCAAGCTGAAGAGCACCTACATTGACCCCTTGCCGGACCTCATCCACCCCAGGACGGGCCGCCTCCACACCCGCTTCAACCAGACGGCCACGGCCACGGGCAGGCTAAGTAGCTCCGATCCCAACCTCCAGAACATCCCCGTCCGCACCCCGCTTGGGCAGAGGATCCGCCGGGCCTTCATCGCCGAGGAGGGGTGGCTATTGGTGGCCCTGGACTATAGCCAGATAGAGCTCAGGGTGCTGGCCCACCTCTCCGGCGACGAGAACCTGATCCGGGTCTTCCAGGAGGGGCGGGACATCCACACGGAGACCGCCAGCTGGATGTTCGGCGTCCCCCGGGAGGCCGTGGACCCCCTGATGCGCCGGGCGGCCAAGACCATCAACTTCGGGGTCCTCTACGGCATGTCGGCCCACCGCCTCTCCCAGGAGCTAGCCATCCCTTACGAGGAGGCCCAGGCCTTCATTGAGCGCTACTTTCAGAGCTTCCCCAAGGTGCGGGCCTGGATTGAGAAGACCCTGGAGGAGGGCAGGAGGCGGGGGTACGTGGAGACCCTCTTCGGCCGCCGCCGCTACGTGCCAGACCTAGAGGCCCGGGTGAAGAGCGTGCGGGAGGCGGCCGAGCGCATGGCCTTCAACATGCCCGTCCAGGGCACCGCCGCCGACCTCATGAAGCTGGCTATGGTGAAGCTCTTCCCCAGGCTGGAGGAAATGGGGGCCAGGATGCTCCTTCAGGTCCACGACGAGCTGGTCCTCGAGGCCCCAAAAGAGAGGGCGGAGGCCGTGGCCCGGCTGGCCAAGGAGGTCATGGAGGGGGTGTATCCCCTGGCCGTGCCCCTGGAGGTGGAGGTGGGGATAGGGGAGGACTGGCTCTCCGCCAAGGAGTGATCGATGATAAGCTGTCAAACATGAGCAGATCTGAGCCCGCCTAATGAGCGGGCTTTTTTTTCAGATCTGCTTGAAGACGAAAG–3'.

The first cytosine is shown in bold. To amplify the template by PCR, the primer sequences used for this construct are 5'–TAATACGACTCACTATAGG–3' and 5'–CTTTCGTCTTCAAGCAGATCTG–3'. The full-length antigenomic HDV (aHDV) sequence with T7 promoter (underlined), and leader sequence is: 5'–TTCCCGCGAAATTAATACGACTCACTATAGGGAGGTTTG**C**GTCTCGCGTCCTTCTTTCCTCTTCGGGTCGGCATGGCATCTCCACCTCCTCGCGGTCCGACCTGGGCATCCGAAGGAGGACGCACGTCCACTCGGATGGCTAAGGGAGAGCCA–3'. The first cytosine is in bold. To amplify the template by PCR, the primer sequences used for this construct are 5'–TTCCCGCGAAATTAATACGACTCACTA–3' and 5'–TGGCTCTCCCTTAGCCATCCGAG–3'.
